# Supplementary material for: Molecular Basis of GABA Hypofunction in Adolescent Schizophrenia-Like Animals
Source: Hindawi journal article supplement (doi:10.1155/2021/9983438), 2021-04-15
Supplement: f1 [file 9983438.f1.docx]

**Supplementary Figure Captions**

**Fig.S1. Mice administrated with MK-801 on PND 10 showed schizophrenia-like behaviors in adolescence.** a)C57BL/6 male mice intraperitoneally received two consecutive injections of MK-801 (0.5mg/kg) or saline on PND 10 with an interval of 8h. Behavioral tests were performed from PND 35. Mice weight on PND 35 before the behavioral tests. No significance between the two groups. p=0.4935. b) Total travelling distance of the open field test. No significance. p=0.4155. c) Travelling distance in the inner zone of the cage. No significance. p= 0.6231. d) Travelling distance in the outer zone of the cage. No significance. p= 0.4627. e) Time spent in exploring the target hole in the probe test. No significance. Data were represented as mean ± SEM. n=14 of Saline and n=16 of MK801. Student’s t-test for two groups’ comparison.

**Fig.S2. Quality control of proteomics data.** a) The boxplot of the coefficient of variance (CV) of proteins’ intensity from duplicate technical replicates for each sample. The median CV value was below 10%, demonstrating accessible technical reproducibility. b-c) The Pearson correlation of proteins’ intensity between duplicate technical replicates for each sample. The R-value ranged from 0.98 to 0.99 (two representative samples were shown). d) The boxplot of the CV value of proteins’ intensity in each group.

**Fig.S3. Integrative analysis of proteomics and single-cell sequencing data of differentially expressed proteins in early-adolescent mice.** a-b) Top GO enrichment of biological function of differentially expressed proteins in excitatory neurons and oligodendrocytes. Circle size represents the protein numbers in each item.

**Fig.S1. Mice administrated with MK-801 on PND 10 showed schizophrenia-like behaviors in adolescence.**


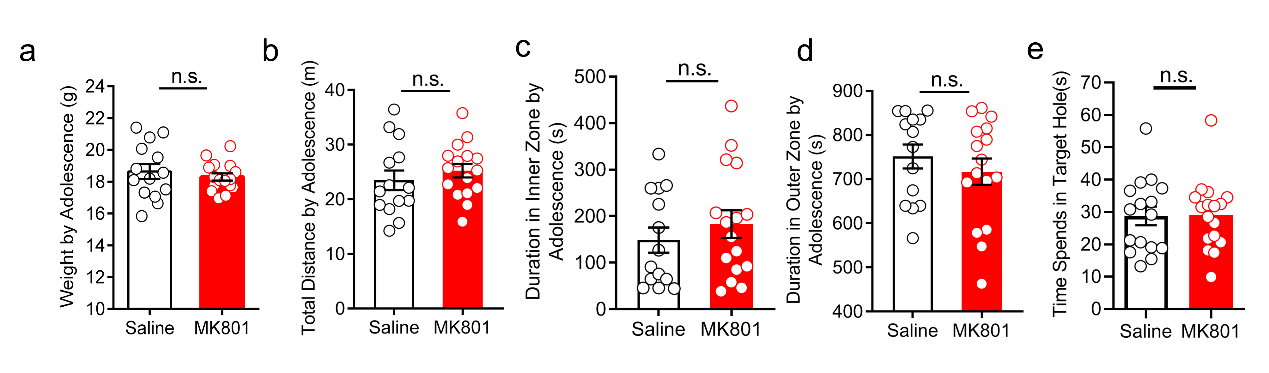


**Fig.S2. Quality control of proteomics data.**


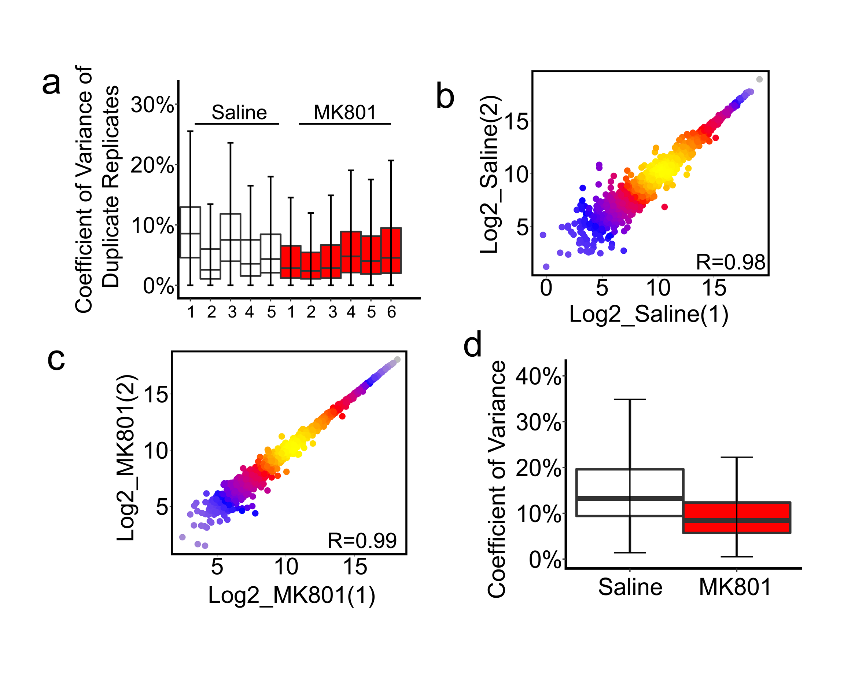


**Fig.S3. Integrative analysis of proteomics and single-cell sequencing data of differentially expressed proteins in early-adolescent mice.**


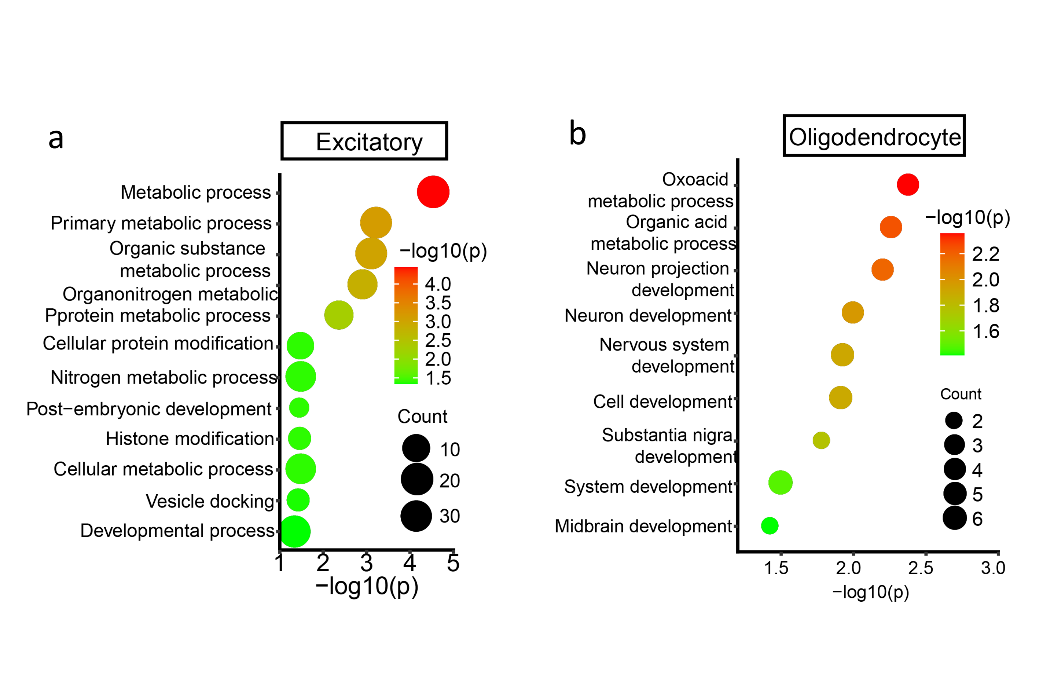


**Supplementary Methods**

**Open Field Test**

An open field test was performed to determine the locomotor activity of the mice. The assessment uses a polycarbonate cage (42 × 22 × 20 cm) with an illumination intensity of 60 lux. During the test, animals were placed in the center of the arena and allowed to move freely for 15 minutes. Video footage was recorded by an overhead camera and analyzed by an automated tracking system. Saline or MK801-treated mice were tested in an alternating fashion to prevent potential bias caused by the test time. Chambers were cleaned using 75% ethanol after each test.

**Elevated Plus Maze Test**

The elevated plus maze (EPM) test is a measure of anxiety in rodents. EPM consists of two closed arms and two open arms with an illumination intensity of 20 lux. The closed arms have 15cm-high walls. Mice were individually placed in the central-open area within the EPM, 50cm above the ground, and allowed to move freely for 5 minutes. An overhead camera recorded the time spent, and the distance moved in the open and closed arms.

**Pre-pulse Inhibition Test**

A pre-pulse inhibition (PPI) test was performed in an SR-LAB startle chamber (San Diego Instruments, USA) with a cylinder to immobilize the mice. A loudspeaker above the cylinder produced white noise acoustic stimuli. A piezoelectric accelerometer underneath the cylinder was used to detect mice movements. Experimental mice were randomly assigned and tested on PND 36. The test began with five-minute acclimatization to the apparatus with a constant 65 dB background noise, followed by ten pulse-only trials (120 dB, 20 ms in duration). Then, ten blocks containing seven trials were presented in a pseudo-random order with inter-trial intervals of 20 sec as follows: 1) pulse-only trials (120 dB), 2) three pre-pulse alone trials (76, 79, and 85 dB, 20 ms in duration), and 3) three pre-pulse-pulse trials (pre-pulse at 76, 79 and 85 dB followed 100 ms after by the pulse). In the end, tern pulse-only trials were delivered. The baseline startle amplitude was the average response to the initial ten pulse-only trials. The percent of pre-pulse inhibition (% PPI) was calculated as: % PPI = 100% x [startle amplitude with pulse-only trial-(startle amplitude after the pre-pulse and pulse trial)]/ (startle amplitude with pulse-only trial). Habituation was calculated as the average startle amplitude of the last ten pulse-only trials divided by the initial ten pulse-only trials. It describes the decrease of the startle response magnitude upon repeated presentation of the same stimulus.

**Nesting Behavior Test**

One hour before darkness, mice were placed alone in the cages with 6g of dry cotton balls evenly spread on top of the padding. After 24 hours, photographs were taken and scored. Score 1: the cotton was almost intact; Score 1.5: the cotton was less than 50% torn and dirty with stools; Score 2: the cotton was less than 50% torn but clean; Score 2.5: the cotton was more than 50% torn but no identifiable nest, and dirty with stools; Score 3: the cotton was more than 50% torn and clean, but the nest is flat; Score 3.5: an identifiable but dirty nest with walls less than mice body height; Score 4: an identifiable and clean nest with walls less than mice body height; Score 4.5: the nest is a crater, but leaving stools inside; 5 the nest is cleanly built with a crater.

**Barnes Maze**

The Barnes maze was used to assess learning and memory in mice. The maze was an opaque Plexiglas disk with 20 holes equally spaced around. A black Plexiglas escape box with food was placed under one of the holes. Three distinct spatial cues were located around the maze. In the training session, 400 lux of light and 90 dB of noise were turned on, and mice were allowed to move freely. The latency to enter the escape hole was recorded. The session ended when the mouse entered the escape hole or after 3min elapsed. If the mice could not enter the escape hole itself, it was gently put in the escape box for 1min. Mice were tested twice a day for four days. In the probing test, the escape hole was covered. Mice were allowed to explore freely on the platform for 1 min. The time spent around the escape hole was determined.
